# Supplementary material
Source: PubMed Central journal article supplement (PMC5981072)
Supplement: AEM.02797-17_zam012188565s1.pdf [file AEM.02797-17_zam012188565s1.pdf]

1 **Supplemental Material**

2 **Title: Cadmium Exposure-*Sedum alfredii* Planting Interactions Shape the**

3 **Bacterial Community in the Hyperaccumulator Plant Rhizosphere**

4 *Dandi Hou<sup>a,b</sup>, Zhi Lin<sup>a</sup>, Runze Wang<sup>a</sup>, Jun Ge<sup>a</sup>, Shuai Wei<sup>a</sup>, Ruohan Xie<sup>a</sup>, Haixin Wang<sup>a</sup>,*  
5 *Kai Wang<sup>b</sup>, Yanfang Hu<sup>c</sup>, Xiaoe Yang<sup>a</sup>, Lingli Lu<sup>a</sup>, and Shengke Tian<sup>a\*</sup>*

6 <sup>a</sup>MOE Key Laboratory of Environmental Remediation and Ecological Health, College  
7 of Environmental and Resource Sciences, Zhejiang University, Hangzhou 310058,  
8 China

9 <sup>b</sup>School of Marine Sciences, Ningbo University, Ningbo, 315211, China

10 <sup>c</sup>Technical Extension Station of Soil Fertilizer and Rural Energy, Kecheng, Quzhou,  
11 324000, China

12

13 \*Corresponding author. <sup>a</sup> Ministry of Education Key Laboratory of Environmental  
14 Remediation and Ecological Health, College of Environmental and Resource Sciences,  
15 Zhejiang University, Hangzhou 310058, China. E-mail: tiansk@zju.edu.cn Tel: +86-  
16 571-88982515 Fax: +86-571-88982907

17

18 Summary of the numbers in supplemental material

19 - The number of pages: 7

20 - The number of figures: 0

21 - The number of table: 4

22 **Table S1** Geochemical properties of the soil used in this study collected from a paddy  
23 field located in Shaoxing, Zhejiang province.

| <b>Parameter</b>             | <b>Value</b> |
|------------------------------|--------------|
| pH                           | 6.58         |
| TOC [g kg <sup>-1</sup> ]    | 11.10        |
| CEC [cmol kg <sup>-1</sup> ] | 8.87         |
| N [g kg <sup>-1</sup> ]      | 1.35         |
| Cd [mg kg <sup>-1</sup> ]    | 0.47         |
| Zn [mg kg <sup>-1</sup> ]    | 91.00        |
| Pb [mg kg <sup>-1</sup> ]    | 289.11       |
| Cu [mg kg <sup>-1</sup> ]    | 28.67        |
| Fe [mg g <sup>-1</sup> ]     | 40.55        |

24

25 **Table S2** Three-way analysis of variance (ANOVA) for alpha-diversity metrics (per  
 26 16,700 sequences) of bacterial communities across different compartments of two *S.*  
 27 *alfredii* ecotypes planted in different Cd-contaminated soils.

| Factor                     | Observed species |                | Simpson |                |
|----------------------------|------------------|----------------|---------|----------------|
|                            | F                | <i>P</i>       | F       | <i>P</i>       |
| Compartment                | 19.79            | < <b>0.001</b> | 81.602  | < <b>0.001</b> |
| Cd                         | 31.483           | < <b>0.001</b> | 26.602  | < <b>0.001</b> |
| Ecotype                    | 0.348            | 0.56           | 36.029  | < <b>0.001</b> |
| Cd : Ecotype               | 2.396            | 0.11           | 14.317  | < <b>0.001</b> |
| Compartment : Ecotype      | 0.005            | 0.946          | 40.385  | < <b>0.001</b> |
| Compartment : Cd           | 1.116            | 0.342          | 10.114  | < <b>0.001</b> |
| Compartment : Cd : Ecotype | 1.137            | 0.335          | 12.081  | < <b>0.001</b> |

28 Bold values represent significant influence of compartment, Cd, ecotype, or their interactions on alpha-diversity  
 29 metrics ( $P < 0.05$ ).

30 **Table S3** Pearson's correlation coefficients (*r*) between Cd level and relative abundances of top phylotypes primarily driving bacterial community  
 31 variation by Cd concentrations at each compartment (*n* = 9). Only the OTUs with significant coefficients are listed. Contribution: percentages of  
 32 the contribution of phylotypes to the overall dissimilarity along the Cd gradient calculated by similarity percentage (SIMPER) analysis. Taxonomy  
 33 of the OTUs was identified in Greengenes database.

| OTU ID                 | Taxa                                                                                           | <i>r</i> | <i>P</i> | Contribution % |
|------------------------|------------------------------------------------------------------------------------------------|----------|----------|----------------|
| <b>HE-Rhizosphere</b>  |                                                                                                |          |          |                |
| OTU43111               | c_Alphaproteobacteria; o_Sphingomonadales; f_Sphingomonadaceae; g_Kaistobacter                 | 0.929    | < 0.001  | 2.19           |
| OTU70716               | c_Alphaproteobacteria; o_Rhizobiales; f_Rhizobiaceae; g_Rhizobium; s_leguminosarum             | 0.899    | 0.001    | 0.36           |
| OTU67423               | p_Gemmatimonadetes; c_Gemmatimonadetes; o_Gemmatimonadales; f_Unclassified                     | 0.878    | 0.002    | 0.69           |
| OTU8159                | p_Actinobacteria; c_Actinobacteria; o_Actinomycetales; f_Streptomycetaceae; g_Streptomyces     | 0.866    | 0.003    | 5.90           |
| OTU27802               | p_Bacteroidetes; c_Cytophagia; o_Cytophagales; f_Cytophagaceae; g_Dyadobacter                  | 0.859    | 0.003    | 0.80           |
| OTU36253               | c_Alphaproteobacteria; o_Sphingomonadales; f_Sphingomonadaceae; g_Novosphingobium              | 0.847    | 0.004    | 0.30           |
| OTU64559               | p_Actinobacteria; c_Actinobacteria; o_Actinomycetales; f_Nocardioidaceae; g_Kribbella          | 0.840    | 0.005    | 0.97           |
| OTU52160               | p_TM7; c_TM7-1; o_Unclassified                                                                 | 0.782    | 0.013    | 0.57           |
| OTU27835               | p_Bacteroidetes; c_[Saprospirae]; o_[Saprospirales]; f_Chitinophagaceae; g_Unclassified        | 0.769    | 0.015    | 0.76           |
| OTU26587               | p_Gemmatimonadetes; c_Gemmatimonadetes; o_Gemmatimonadales; f_Ellin5301; g_Unclassified        | 0.759    | 0.018    | 0.85           |
| OTU18887               | c_Alphaproteobacteria; o_Caulobacterales; f_Caulobacteraceae; g_Asticcacaulis; s_biprosthecium | 0.722    | 0.028    | 0.35           |
| OTU5499                | p_Acidobacteria; c_iii1-8; o_32-20; f_Unclassified                                             | -0.877   | 0.002    | 0.26           |
| OTU16416               | c_Gammaproteobacteria; o_Xanthomonadales; f_Xanthomonadaceae; g_Lysobacter                     | -0.796   | 0.010    | 0.31           |
| <b>NHE-Rhizosphere</b> |                                                                                                |          |          |                |
| OTU67423               | p_Gemmatimonadetes; c_Gemmatimonadetes; o_Gemmatimonadales; f_Unclassified                     | 0.981    | < 0.001  | 1.02           |

|                 |                                                                                          |        |         |      |
|-----------------|------------------------------------------------------------------------------------------|--------|---------|------|
| OTU45407        | p_Gemmatimonadetes; c_Gemmatimonadetes; o_Gemmatimonadales; f_Ellin5301; g_Unclassified  | 0.956  | < 0.001 | 0.51 |
| OTU22606        | c_Alphaproteobacteria; o_Caulobacterales; f_Caulobacteraceae; g_Unclassified             | 0.948  | < 0.001 | 0.37 |
| OTU26587        | p_Gemmatimonadetes; c_Gemmatimonadetes; o_Gemmatimonadales; f_Ellin5301; g_Unclassified  | 0.936  | < 0.001 | 1.97 |
| OTU5860         | p_Gemmatimonadetes; c_Gemmatimonadetes; o_Gemmatimonadales; f_Unclassified               | 0.933  | < 0.001 | 0.65 |
| OTU44886        | p_Gemmatimonadetes; c_Gemm-1; o_Unclassified                                             | 0.917  | 0.001   | 0.39 |
| OTU51638        | c_Gammaproteobacteria; o_Xanthomonadales; f_Xanthomonadaceae; g_Lysobacter; s_brunescens | 0.764  | 0.016   | 0.56 |
| OTU67051        | c_Betaproteobacteria; o_Ellin6067; f_Unclassified                                        | 0.713  | 0.031   | 0.38 |
| OTU13447        | p_TM7; c_TM7-1; o_Unclassified                                                           | -0.828 | 0.006   | 0.34 |
| <b>HE-Bulk</b>  |                                                                                          |        |         |      |
| OTU22606        | c_Alphaproteobacteria; o_Caulobacterales; f_Caulobacteraceae; g_Unclassified             | 0.980  | < 0.001 | 0.44 |
| OTU44886        | p_Gemmatimonadetes; c_Gemm-1; o_Unclassified                                             | 0.943  | < 0.001 | 0.37 |
| OTU67423        | p_Gemmatimonadetes; c_Gemmatimonadetes; o_Gemmatimonadales; f_Unclassified               | 0.925  | < 0.001 | 0.91 |
| OTU26587        | p_Gemmatimonadetes; c_Gemmatimonadetes; o_Gemmatimonadales; f_Ellin5301; g_Unclassified  | 0.899  | 0.001   | 1.47 |
| OTU58630        | c_Betaproteobacteria; o_MND1; f_Unclassified                                             | 0.888  | 0.001   | 0.45 |
| OTU29538        | p_Gemmatimonadetes; c_Gemmatimonadetes; o_Gemmatimonadales; f_Unclassified               | 0.895  | 0.001   | 0.57 |
| OTU5860         | p_Gemmatimonadetes; c_Gemmatimonadetes; o_Gemmatimonadales; f_Unclassified               | 0.849  | 0.004   | 0.58 |
| OTU12669        | c_Alphaproteobacteria; o_Rhizobiales; f_Hyphomicrobiaceae; g_Rhodoplanes                 | 0.765  | 0.016   | 0.34 |
| OTU32799        | c_Deltaproteobacteria; o_Myxococcales; f_Haliangiaceae; g_Unclassified                   | 0.763  | 0.017   | 0.41 |
| OTU50328        | p_Acidobacteria; c_Acidobacteria-6; o_iii1-15; f_Unclassified                            | -0.851 | 0.004   | 0.28 |
| <b>NHE-Bulk</b> |                                                                                          |        |         |      |
| OTU5860         | p_Gemmatimonadetes; c_Gemmatimonadetes; o_Gemmatimonadales; f_Unclassified               | 0.980  | < 0.001 | 0.58 |
| OTU45407        | p_Gemmatimonadetes; c_Gemmatimonadetes; o_Gemmatimonadales; f_Ellin5301; g_Unclassified  | 0.943  | < 0.001 | 0.53 |
| OTU58630        | c_Betaproteobacteria; o_MND1; f_Unclassified                                             | 0.925  | < 0.001 | 0.37 |
| OTU67423        | p_Gemmatimonadetes; c_Gemmatimonadetes; o_Gemmatimonadales; f_Unclassified               | 0.899  | 0.001   | 0.96 |
| OTU22606        | c_Alphaproteobacteria; o_Caulobacterales; f_Caulobacteraceae; g_Unclassified             | 0.888  | 0.001   | 0.49 |
| OTU67051        | c_Betaproteobacteria; o_Ellin6067; f_Unclassified                                        | 0.895  | 0.001   | 0.44 |
| OTU44886        | p_Gemmatimonadetes; c_Gemm-1; o_Unclassified                                             | 0.849  | 0.004   | 0.35 |

|                       |                                                                                          |        |         |      |
|-----------------------|------------------------------------------------------------------------------------------|--------|---------|------|
| OTU26587              | p_Gemmatimonadetes; c_Gemmatimonadetes; o_Gemmatimonadales; f_Ellin5301; g_Unclassified  | 0.765  | 0.016   | 1.65 |
| OTU19426              | p_Acidobacteria; c_Acidobacteria-6; o_iii1-15; f_Unclassified                            | 0.763  | 0.017   | 0.37 |
| OTU28276              | p_Gemmatimonadetes; c_Gemmatimonadetes; o_Ellin5290; f_Unclassified                      | 0.672  | 0.047   | 0.37 |
| OTU6487               | c_Alphaproteobacteria; o_Rickettsiales; f_mitochondria; g_Unclassified                   | 0.669  | 0.049   | 0.39 |
| OTU37719              | c_Alphaproteobacteria; o_Sphingomonadales; f_Sphingomonadaceae; g_Kaistobacter           | -0.756 | 0.018   | 0.41 |
| <b>Unplanted soil</b> |                                                                                          |        |         |      |
| OTU67423              | p_Gemmatimonadetes; c_Gemmatimonadetes; o_Gemmatimonadales; f_Unclassified               | 0.918  | < 0.001 | 1.12 |
| OTU5860               | p_Gemmatimonadetes; c_Gemmatimonadetes; o_Gemmatimonadales; f_Unclassified               | 0.949  | < 0.001 | 0.41 |
| OTU22606              | c_Alphaproteobacteria; o_Caulobacterales; f_Caulobacteraceae; g_Unclassified             | 0.941  | < 0.001 | 0.34 |
| OTU51638              | c_Gammaproteobacteria; o_Xanthomonadales; f_Xanthomonadaceae; g_Lysobacter; s_brunescens | 0.906  | 0.001   | 1.11 |
| OTU70479              | p_Actinobacteria; c_Actinobacteria; o_Actinomycetales; f_Intrasporangiaceae              | 0.858  | 0.003   | 1.86 |
| OTU51141              | p_Actinobacteria; c_Thermoleophilia; o_Solirubrobacteriales; f_Unclassified              | 0.859  | 0.003   | 0.43 |
| OTU44886              | p_Gemmatimonadetes; c_Gemm-1; o_Unclassified                                             | 0.864  | 0.003   | 0.39 |

35 **Table S4** Closest matched type strains of the representative phylotypes associated with the Cd level based on 16S rRNA gene in EzTaxon database.

| OTU ID                             | Length (bp) | Closest match                                                 | Similarity (%) | Accession    | Taxonomy                                                                              |
|------------------------------------|-------------|---------------------------------------------------------------|----------------|--------------|---------------------------------------------------------------------------------------|
| <b>Positively correlated group</b> |             |                                                               |                |              |                                                                                       |
| OTU8159                            | 445         | <i>Streptomyces lucensis</i> NBRC 13056 <sup>T</sup>          | <b>99.55</b>   | AB184280     | Actinobacteria;Actinobacteria;Streptomycetales;Streptomyce<br>taceae;Streptomyces     |
| OTU43111                           | 440         | <i>Sphingomonas lutea</i> JS5 <sup>T</sup>                    | <b>99.32</b>   | JF922305     | Alphaproteobacteria;Sphingomonadales;Sphingomonadaceae<br>;Sphingomonas               |
| OTU26587                           | 457         | <i>Gemmatimonas phototrophica</i> AP64 <sup>T</sup>           | 92.78          | AUXF01000006 | Gemmatimonadetes;Gemmatimonadetes;Gemmatimonadales<br>;Gemmatimonadaceae;Gemmatimonas |
| OTU67423                           | 458         | <i>Gemmatirosa kalamazoonesis</i> KBS708 <sup>T</sup>         | 91.68          | CP007128     | Gemmatimonadetes;Gemmatimonadetes;Gemmatimonadales<br>;Gemmatimonadaceae;Gemmatirosa  |
| OTU44886                           | 454         | <i>Gemmatirosa kalamazoonesis</i> KBS708 <sup>T</sup>         | 86.78          | CP007128     | Gemmatimonadetes;Gemmatimonadetes;Gemmatimonadales<br>;Gemmatimonadaceae;Gemmatirosa  |
| OTU64559                           | 445         | <i>Kribbella ginsengisoli</i> Gsoil 001 <sup>T</sup>          | <b>99.55</b>   | AB245391     | Actinobacteria;Actinobacteria;Propionibacteriales;Nocardioi<br>daceae;Kribbella       |
| OTU27802                           | 460         | <i>Dyadobacter soli</i> MJ20 <sup>T</sup>                     | <b>99.35</b>   | GQ241324     | Bacteroidetes;Cytophagia;Cytophagales;Cytophagaceae;Dya<br>dobacter                   |
| OTU27835                           | 460         | <i>Niastella vici</i> DJ57 <sup>T</sup>                       | <b>98.70</b>   | KT388748     | Bacteroidetes;Sphingobacteriia;Sphingobacteriales;Chitinoph<br>agaceae;Niastella      |
| OTU70716                           | 440         | <i>Rhizobium acidisoli</i> FH13 <sup>T</sup>                  | <b>99.55</b>   | KJ921033     | Alphaproteobacteria;Rhizobiales;Rhizobiaceae;Rhizobium                                |
| OTU36253                           | 440         | <i>Novosphingobium subterraneum</i> DSM<br>12447 <sup>T</sup> | <b>98.64</b>   | JRVC01000007 | Alphaproteobacteria;Sphingomonadales;Sphingomonadaceae<br>;Novosphingobium            |
| OTU52160                           | 441         | <i>Candidatus Saccharimonas aalborgensis</i>                  | 86.62          | CP005957     | Saccharibacteria_TM7;Saccharimonas;Saccharimonas;Sacch<br>arimonas;Saccharimonas      |
| <b>Negatively correlated group</b> |             |                                                               |                |              |                                                                                       |
| OTU50328                           | 464         | <i>Vicinamibacter silvestris</i> Ac_5_C6 <sup>T</sup>         | 92.24          | KP761690     | Acidobacteria;Vicinamibacter;Vicinamibacter;Vicinamibacte<br>r;Vicinamibacter         |
| OTU5499                            | 466         | <i>Cystobacter badius</i> DSM 14723 <sup>T</sup>              | 84.91          | DQ768108     | Deltaproteobacteria;Myxococcales;Archangiaceae;Cystobact<br>er                        |
| OTU16416                           | 465         | <i>Lysobacter terrae</i> THG-A13 <sup>T</sup>                 | <b>99.57</b>   | KF483861     | Gammaproteobacteria;Xanthomonadales;Xanthomonadaceae<br>;Lysobacter                   |
| OTU37719                           | 440         | <i>Sphingomonas jaspsi</i> DSM 18422 <sup>T</sup>             | <b>98.18</b>   | KK073876     | Alphaproteobacteria;Sphingomonadales;Sphingomonadaceae<br>;Sphingomonas               |

36 Bold values represent similarity > 97%.
